# Supplementary material
Source: PubMed Central journal article supplement (PMC5663294)
Supplement: NIHMS885796-supplement-1.pdf [file NIHMS885796-supplement-1.pdf]

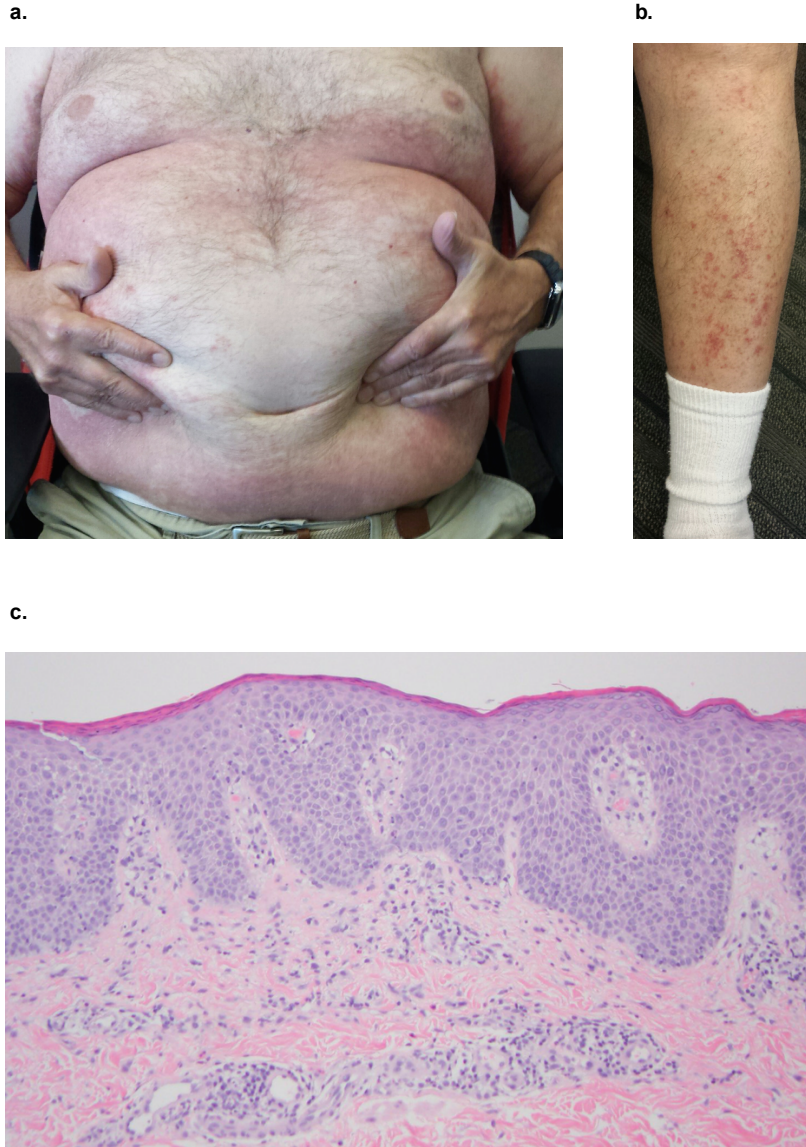

**Figure S1. Related to Figure 1. Rash observed in the randomized, double blind, placebo-controlled trial.** This occurred in an obese (BMI at baseline:  $36.1 \text{ kg/m}^2$ ) 65-year old male patient diagnosed with diabetes 4 years before baseline. This patient had also been diagnosed with fatty liver disease, hypertension, hyperlipidemia and Barret's esophagus. Rash on **a)** the abdomen and **b)** legs photographed at its peak severity. The rash occurred 29 days from baseline and it was diffuse, pruritic and maculopapular, erupting first at the abdomen and spreading to the patient's chest, axillae, legs and arm. The center of the abdomen was spared. Maximum symptoms occurred at day 3 to 6 after onset, and the patient was prescribed topical steroids (Triamcinolone 0.1% cream) and antihistamines (diphenhydramine 25 mg tablet PRN) to relieve symptoms, but did not have to use these more than four days. The rash improved despite the continuation of the treatment. **(c)** 8 days after the initial symptoms, a punch-biopsy was performed from the left flank, which revealed a perivascular lymphocytic infiltrate and scattered eosinophils, consistent with an eczematous drug eruption. The rash started to resolve 12 days after initial symptoms and was completely abated at day 14 after onset.

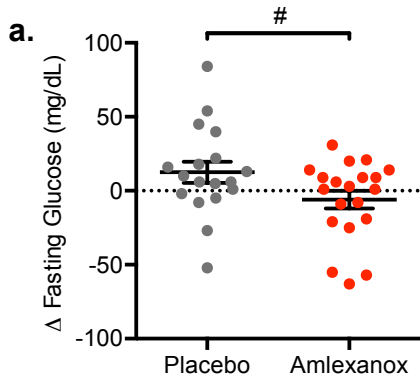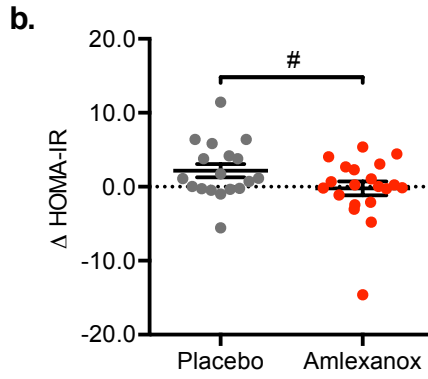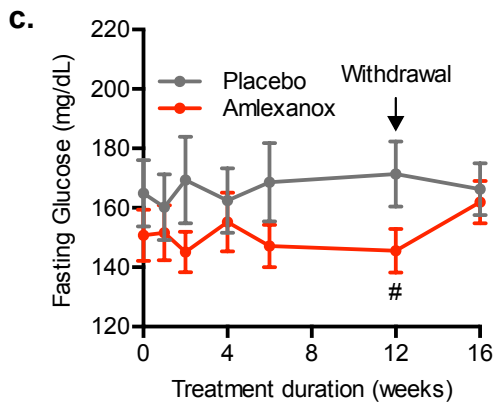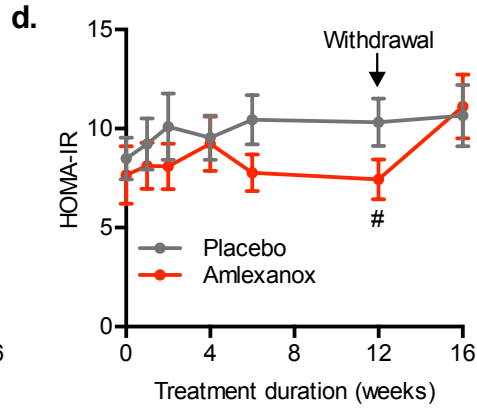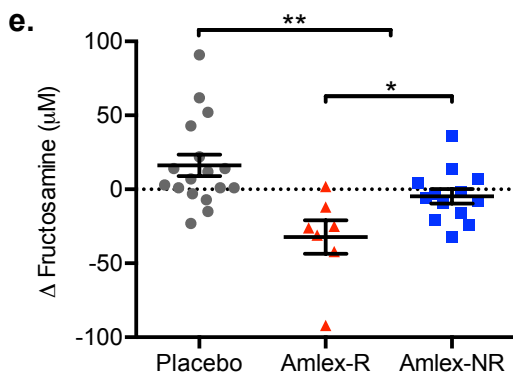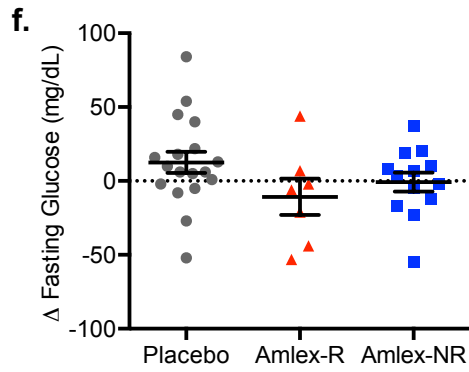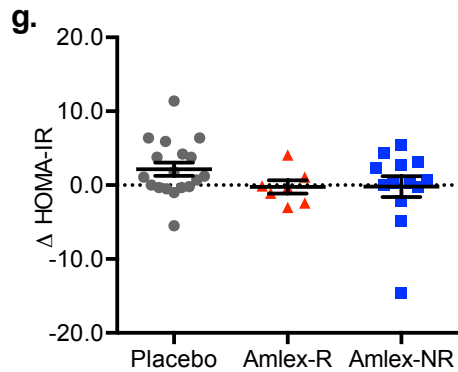

**Figure S2. Related to Figure 3. Effects of amlexanox on fasting glucose and HOMA-IR.** **a)** Change in fasting glucose from baseline to 12 weeks is shown from the entire patient cohort. **b)** Change from baseline to 12 weeks in calculated HOMA-IR from fasting glucose and insulin over the trial period is shown. **c)** Serial fasting glucose levels and **(d)** HOMA-IR across the trial period. **e,f,g)** Difference of fructosamine, fasting glucose and HOMA-IR from baseline with amlexanox treated patients categorized as responders (Amlex-R) and non-responders (Amlex-NR). The responders correspond to the patients with a reduction of HbA1c  $\geq 0.5\%$ .  $n = 18$  placebo, 20 amlexanox (7 Amlex-R, 13 Amlex-NR), except **c** and **d** baseline, where  $n = 21$  placebo, 21 amlexanox. \* indicates  $p$ -value  $\leq 0.05$ , # indicates  $p$ -value  $\leq 0.10$  (two-tailed t-test). Data shown as individual values and mean  $\pm$  s.e.m. (**a, b, e, f, g**) or mean  $\pm$  s.e.m. only (**c,d**). HOMA-IR, Homeostatic Model Assessment-Insulin Resistance; NR, non-responder; R, responder.

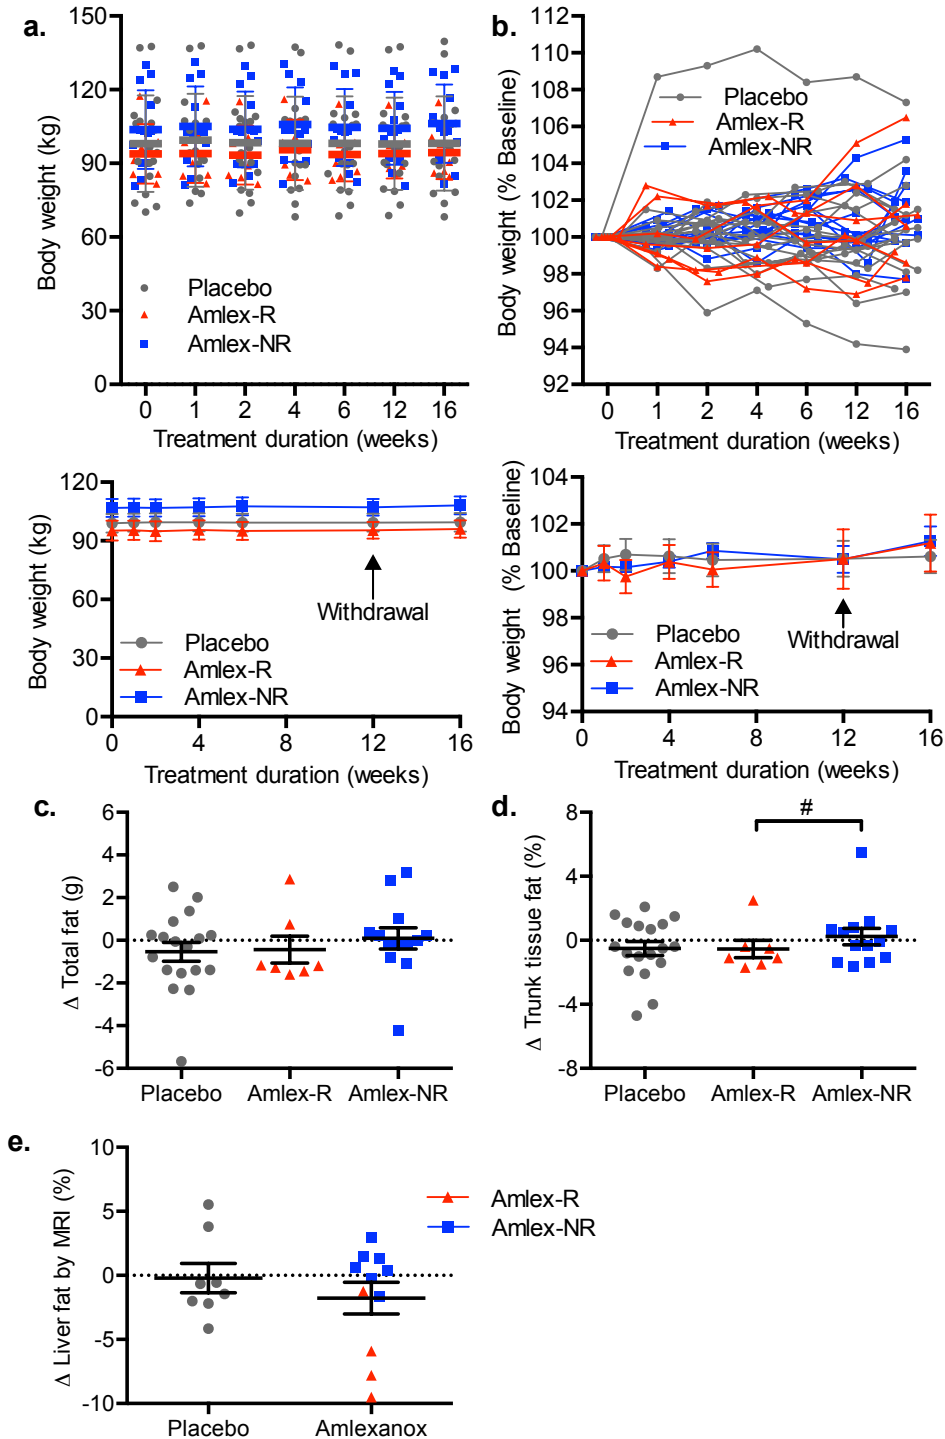

**Figure S3. Related to Figure 3. Amlexanox-induced changes in adiposity.** a) Body weight and b) Percent body weight compared to baseline were stable throughout the study. Individual data distribution (upper panels  $n = 18$  placebo, 7 amlex-R, 13 amlex-NR) versus mean (lower panels  $n = 16$  placebo, 6 amlex-R, 11 amlex-NR) is shown. Mean values contain only complete

data sets as there was missing data in some of the intermediate visits in a few subjects due to the winter storms. **c**) Change in total fat mass percent, **(d)** trunk fat percent and **(e)** liver fat detected by the MRI-Dixon method. # indicates  $p$ -value  $\leq 0.10$  (two-tailed t-test). **c, d**)  $n = 18$  placebo, 7 amlex-R, 13 amlex-NR **e**)  $n = 8$  placebo, 4 amlex-R, 7 amlex-NR. Data shown as individual values and mean  $\pm$  s.e.m, or mean  $\pm$  s.e.m. only (lower panels **a** and **b**). Amlex-NR, Amlexanox non-responder; Amlex-R, responder.

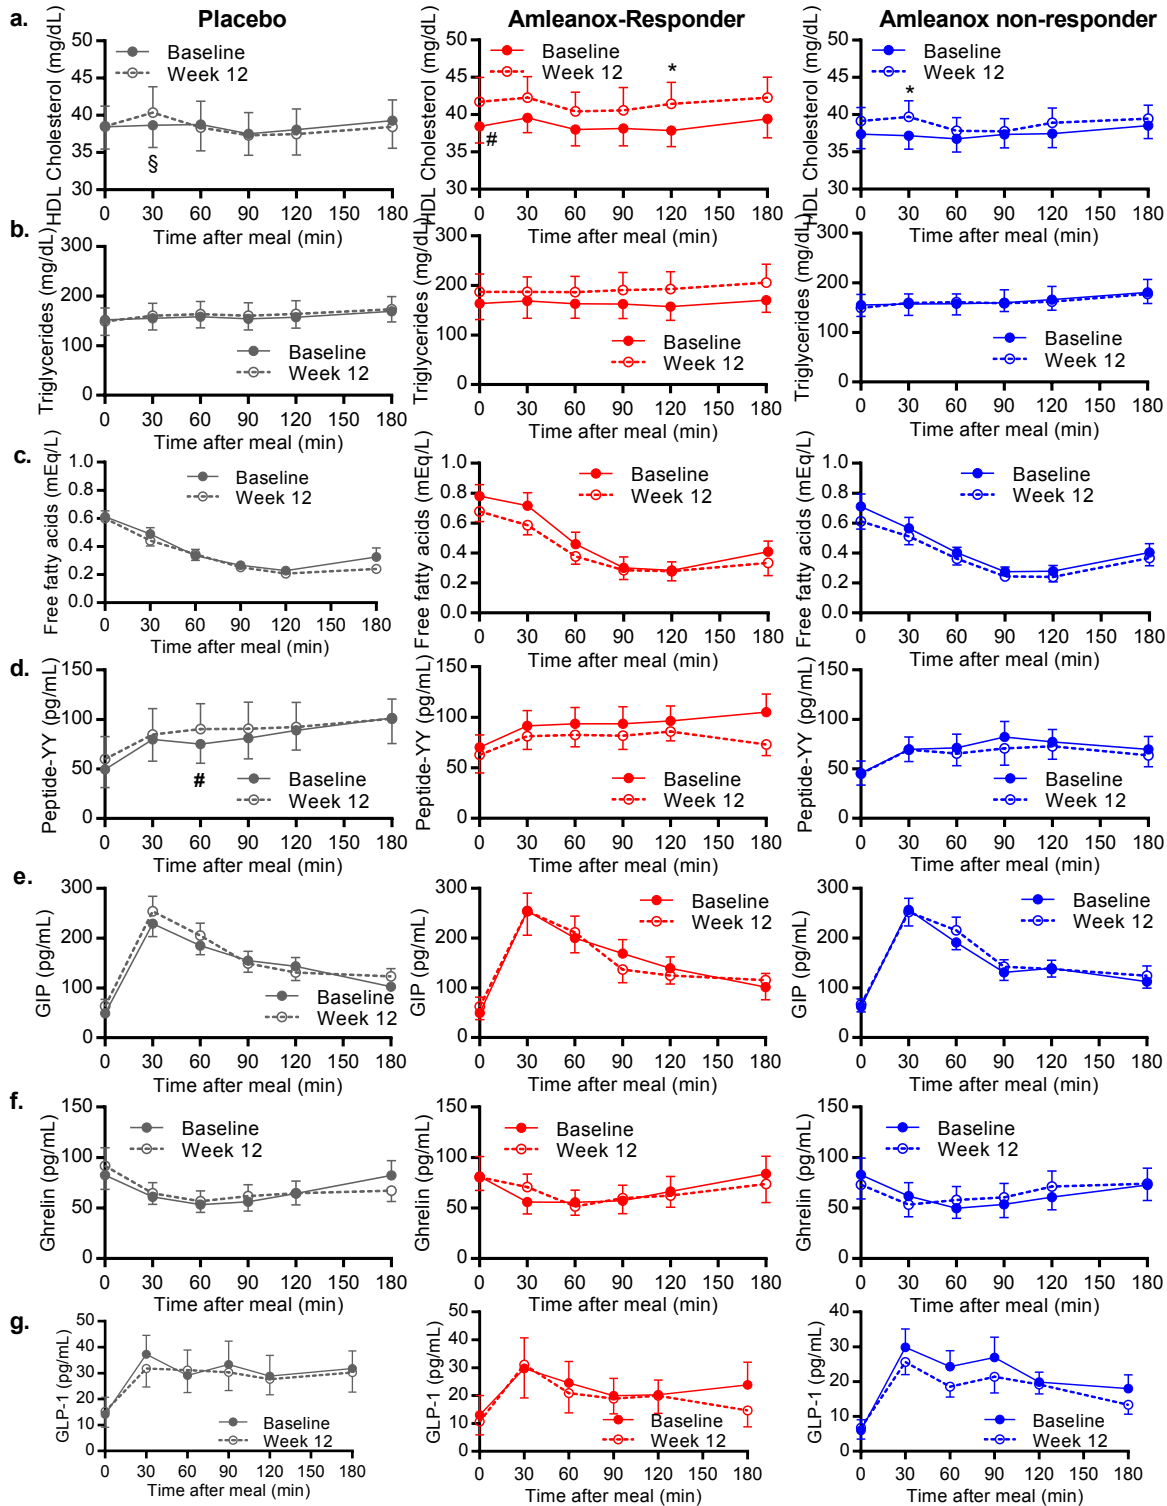

**Figure S4. Related to Figure 3. Mixed meal responses at baseline and 12 weeks.** Lipid and hormone levels during the mixed meal tolerance test at baseline and 12 weeks: **(a)** HDL cholesterol, **(b)** The triglyceride levels, **(c)** Free fatty acids, **(d)** Peptide YY, **(e)** gastric inhibitory

polypeptide (GIP) (f) Ghrelin and (g) Glucagon-like peptide-1 (GLP-1).  $n = 17$  placebo, 7 amlex-R, 13 amlex-NR. \* indicates  $p$ -value  $\leq 0.05$ , # indicates  $p$ -value  $\leq 0.10$  (two-tailed paired t-test). Data shown as mean  $\pm$  s.e.m. Amlex-NR, amlexanox non-responder; Amlex-R, responder.

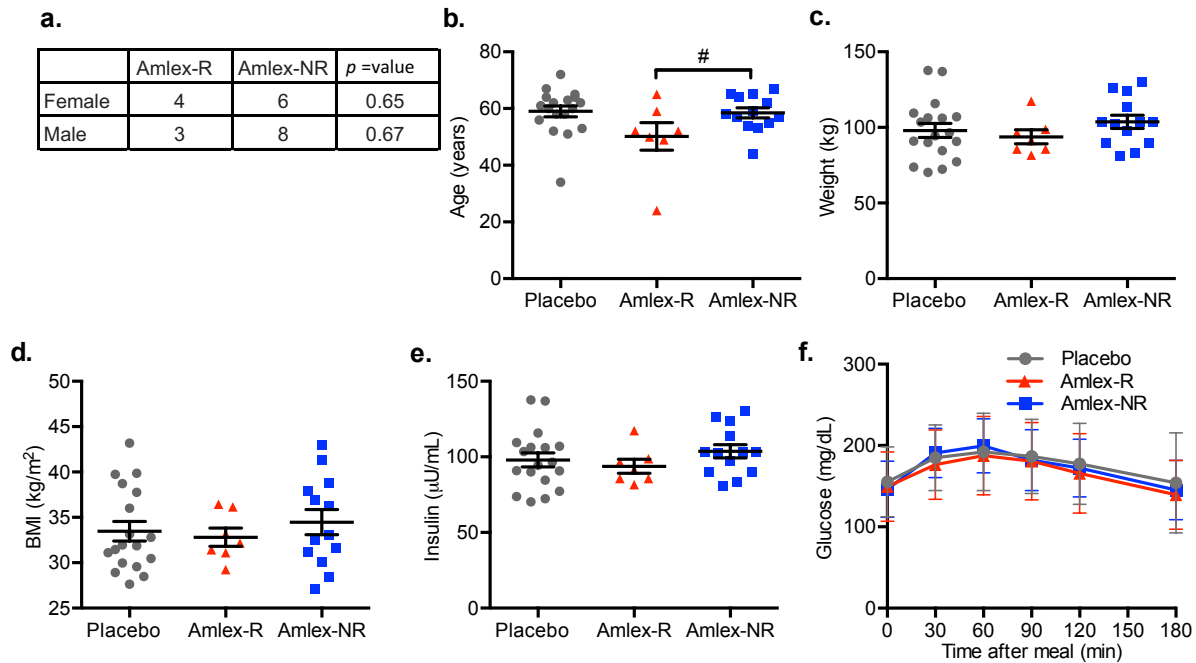

**Figure S5. Related to Figure 4. Baseline characteristics in responders and non-responders.** **a)** Gender distribution ( $\chi^2$  test). **b)** Distribution of age in different groups. **c)** Weight or **(d)** Body mass index (BMI) at baseline did not differ among study groups. **e)** Insulin levels at baseline and **(f)** Post-mixed meal glucose curves at baseline did not differ among the study groups. Amlex-NR, Amlexanox non-responder; Amlex-R, responder.  $n = 18$  placebo, 7 amlex-R, 13 amlex-NR. \* indicates  $p$ -value  $\leq 0.05$ , # indicates  $p$ -value  $\leq 0.10$  (two-tailed t-test). Data shown as individual values and mean  $\pm$  s.e.m. (**b-e**), or mean  $\pm$  s.e.m. only (**f**). Amlex-R: responder, Amlex-NR: Amlexanox non-responder, BMI: body mass index.

**Table S1:** Related to Figure 1. Treatment emergent adverse events in the open-labeled trial.

| <b>Adverse Event</b>                  | <b>Patient<br/>1</b> | <b>Patient<br/>2</b> | <b>Patient<br/>3</b> | <b>Patient<br/>4</b> | <b>Patient<br/>5</b> | <b>Patient<br/>6</b> |
|---------------------------------------|----------------------|----------------------|----------------------|----------------------|----------------------|----------------------|
| Rash                                  | X                    |                      |                      | X                    |                      |                      |
| Polyuria                              |                      |                      |                      |                      | X                    |                      |
| Nausea                                |                      |                      |                      |                      | X                    |                      |
| Restless Legs                         |                      | X                    |                      |                      |                      |                      |
| Upper respiratory<br>infection        |                      | X                    |                      | X                    |                      |                      |
| Elevated<br>Triglycerides             | X                    |                      |                      |                      |                      |                      |
| Breast Abscess                        |                      |                      | X                    |                      |                      |                      |
| Subcutaneous nodule<br>at biopsy site |                      |                      |                      |                      |                      | X                    |

All events were graded mild to moderate. There were no serious adverse events.



**Table S2:** Related to Figure 3. Subject disposition for key study parameters.

| <b>Parameter</b>               | <b>Placebo</b><br><i>n included / n excluded, reasons</i>                                        | <b>Amlexanox</b><br><i>n included / n excluded, reasons</i> |
|--------------------------------|--------------------------------------------------------------------------------------------------|-------------------------------------------------------------|
| <b>HbA1c</b>                   | 18/3<br>Two early drop-out, One withdrawn for high HbA1c after Day 1                             | 20/1<br>One withdrawn without dosing due to high CK         |
| <b>Fructosamine</b>            | 17/4<br>One additional excluded for missing baseline value due to order entry error              | 20/1                                                        |
| <b>Biochemical parameters*</b> | 18/3                                                                                             | 20/1                                                        |
| <b>CRP</b>                     | 17/4<br>One additional excluded for compromised baseline sample                                  | 20/1                                                        |
| <b>Mixed meal test</b>         | 18/3                                                                                             | 20/1                                                        |
| <b>DEXA</b>                    | 18/3                                                                                             | 20/1                                                        |
| <b>MRI for liver fat</b>       | 8/13<br>Twelve not completed for funding reasons, one with baseline study, 12-week not done: SAE | 11/10<br>Ten not completed for funding reasons              |
| <b>Fat Biopsy</b>              | 16/5<br>One 12-week not done due to SAE and pne subject aborted baseline biopsy                  | 20/1                                                        |
| <b>16 week follow-up</b>       | 18/3                                                                                             | 19/2<br>One patient did not return for 16-week visit        |

\*24-hour urine protein samples were available from only 16 patients in each group due to patient compliance.

**Table S3:** Related to Figure 3. Treatment-emergent adverse events in the randomized, double blind, placebo-controlled study.

| Event Terms                                                                       | Placebo | Amlexanox | P-value |
|-----------------------------------------------------------------------------------|---------|-----------|---------|
| <b>Rash<sup>a</sup></b>                                                           | 3       | 4         | 0.70    |
| <b>Gastro-intestinal</b><br>(nausea, diarrhea, abdominal pain)                    | 7       | 4         | 0.37    |
| <b>Infection</b><br>(gastroenteritis, sinusitis, upper respiratory, paronychia)   | 9       | 7         | 0.62    |
| <b>Neurological</b><br>(headache, worsening neuropathy, lightheadedness, vertigo) | 5       | 4         | 0.74    |
| <b>Cardiovascular</b>                                                             |         |           |         |
| NSTEMI <sup>b</sup>                                                               | 1       | 0         | 0.32    |
| Increased blood pressure                                                          | 1       | 0         | 0.32    |
| Palpitations                                                                      | 0       | 1         | 0.32    |
| <b>Other</b>                                                                      |         |           |         |
| Myalgias                                                                          | 2       | 2         | 1.00    |
| Pruritis (no rash)                                                                | 0       | 2         | 0.16    |
| Urinary frequency                                                                 | 0       | 1         | 0.32    |
| Hot flushes                                                                       | 1       | 0         | 0.32    |
| Lower extremity edema                                                             | 0       | 2         | 0.16    |
| Elevated CK                                                                       | 0       | 1         | 0.32    |
| Nephrolithiasis                                                                   | 0       | 1         | 0.32    |
| Hypoglycemia                                                                      | 1       | 0         | 0.32    |

<sup>a</sup>Graded as possibly-to definitely related to treatment.

<sup>b</sup>Graded as serious adverse event, caused premature un-blinding.

**Table S4:** Related to Figure 3. Key data from individual patients.

| Patient Number  | Group | Response Status | Disposition | HbA1c Baseline % | HbA1c 12weeks % | Fructosamine Baseline μmol/L | Fructosamine 12-weeks μmol/L | Liver Fat MRI % | Liver Fat MRI % |
|-----------------|-------|-----------------|-------------|------------------|-----------------|------------------------------|------------------------------|-----------------|-----------------|
| <b>AMLX2-01</b> | A     | R               | Completed   | 7.4              | 6.5             | 209                          | 211                          | 17.9            | 10.1            |
| <b>AMLX2-02</b> | A     | R               | Completed   | 7.1              | 6.5             | 252                          | 240                          | 14.2            | 4.7             |
| <b>AMLX2-03</b> | P     | N/A             | Completed   | 7.1              | 7               | 239                          | 240                          | 27              | 25              |
| <b>AMLX2-04</b> | P     | N/A             | Completed   | 9.9              | 10.5            | 441                          | 463                          | 15.4            | 13.2            |
| <b>AMLX2-05</b> | A     | NR              | Completed   | 6.7              | 6.4             | 209                          | 203                          |                 |                 |

|          |   |        |                       |      |      |     |     |       |       |
|----------|---|--------|-----------------------|------|------|-----|-----|-------|-------|
| AMLX2-06 | A | NR     | Completed             | 7.3  | 7.4  | 281 | 260 | 1.7   | 1.45  |
| AMLX2-07 | P | N/A    | Completed             | 6.9  | 6.6  | 299 | 300 | 9.1   | 4.94  |
| AMLX2-08 | P | N/A    | Completed             | 8    | 10.4 | 310 | 372 | 5.5   | 4.93  |
| AMLX2-09 | A | NR     | Completed             | 6.9  | 7    | 263 | 255 | 16.92 | 18.4  |
| AMLX2-10 | P | N/A    | Completed             | 7    | 7    | 259 | 273 |       |       |
| AMLX2-11 | A | NR     | Completed             | 6.9  | 7.1  | 211 | 247 | 22.9  | 23.27 |
| AMLX2-12 | A | NR     | Completed             | 6.8  | 6.8  | 248 | 246 | 10.44 | 13.4  |
| AMLX2-13 | P | N/A    | Completed             | 8.3  | 9.1  | 262 | 353 | 18.26 | 23.78 |
| AMLX2-14 | P | N/A    | Completed             | 7.3  | 7.4  | 252 | 255 | 19.9  | 18.46 |
| AMLX2-15 | P | N/A    | Completed             | 7.3  | 7.6  | 244 | 258 |       |       |
| AMLX2-16 | P | N/A    | Completed             | 6.7  | 6.6  | 213 | 214 | 4.1   | 3.44  |
| AMLX2-17 | A | NR     | Completed             | 6.7  | 7.1  | 245 | 249 |       |       |
| AMLX2-18 | P | N/A    | Completed             | 7    | 7    | 276 | 319 | 10.65 |       |
| AMLX2-19 | A | R      | Completed             | 9.5  | 7.1  | 366 | 274 | 24.84 | 23.6  |
| AMLX2-20 | A | NR     | Completed             | 8.4  | 8.6  | 309 | 323 | 31.35 | 32.7  |
| AMLX2-21 | A | NR     | Completed             | 6.7  | 7.2  | 241 | 232 | 15.23 | 13.6  |
| AMLX2-22 | P | N/A    | Completed             | 7.4  | 8.1  | 291 | 343 |       |       |
| AMLX2-23 | P | N/A    | Completed             | 8    | 7.6  | 266 | 251 | 5.49  | 9.3   |
| AMLX2-24 | A | R      | Completed             | 8    | 7.5  | 271 | 246 | 33.9  | 28    |
| AMLX2-25 | A | N/A    | Completed             | 10.1 | 10.2 | 402 | 409 | 8.62  | 9.2   |
| AMLX2-26 | P | N/A    | Early drop-out        | 7.8  |      | 292 |     |       |       |
| AMLX2-27 | P | N/A    | Early-drop-out        | 10.9 |      | 439 |     |       |       |
| AMLX2-28 | P | N/A    | Completed             | 6.6  | 6.8  | 258 | \$  |       |       |
| AMLX2-29 | P | N/A    | Completed             | 6.6  | 6.4  | 236 | 229 |       |       |
| AMLX2-30 | A | NR     | Completed             | 7.4  | 8.1  | 325 | 301 |       |       |
| AMLX2-31 | A | R      | Completed             | 8.2  | 7.2  | 316 | 274 |       |       |
| AMLX2-32 | P | N/A    | Completed             | 8.3  | 8.1  | 294 | 271 |       |       |
| AMLX2-33 | A | NR     | Completed             | 7    | 6.8  | 251 | 235 |       |       |
| AMLX2-34 | P | N/A    | Completed             | 7.7  | 7.7  | 258 | 270 |       |       |
| AMLX2-35 | P | N/A    | Early drop-out        | 8.2  |      | 270 |     |       |       |
| AMLX2-36 | A | N/A    | Early drop-out        | 7.4  |      | 240 |     |       |       |
| AMLX2-37 | P | N/A, * | Completed             | 7.6  | 6.9  | 234 | 231 |       |       |
| AMLX2-38 | A | NR     | Completed, no week 16 | 8.5  | 8.1  | 342 | 310 |       |       |
| AMLX2-39 | A | R      | Completed             | 8.6  | 7.8  | 289 | 258 |       |       |
| AMLX2-40 | A | NR     | Completed             | 8.6  | 8.8  | 321 | 318 |       |       |
| AMLX2-41 | P | N/A    | Completed             | 8.6  | 8.9  | 263 | 270 |       |       |
| AMLX2-42 | A | R      | Completed             | 7    | 6.5  | 253 | 227 |       |       |

A: Amlexanox, P: Placebo, R: Responder in the Amlexanox group, NR: Non-responder in the Amlexanox group, N/A: Not applicable to be classified as a responder, either early drop-out or placebo group

\$ 12-week fructosamine missing due to order entry error

\*Placebo effect: Clinically significant drop in HbA1c in the placebo group

*Note: MRI was attempted in 20 subjects only until 20 baseline MRIs were completed, not done in patients 5, 10, 15, and 22 due to presence of a contraindication for an MRI or history of claustrophobia*

**Table S5:** Related to Figure 4. Amlexanox and amlexanox metabolites in serum. Spreadsheet in separate attachment.

**Table S6:** Related to Figure 5. Pathway enrichment of genes whose expression was either upregulated or downregulated by amlexanox treatment in the responders.

| <i>Upregulated</i>                             |              |                |                                                                                                                                                      |
|------------------------------------------------|--------------|----------------|------------------------------------------------------------------------------------------------------------------------------------------------------|
| <i>Term</i>                                    | <i>Count</i> | <i>p-value</i> | <i>Genes</i>                                                                                                                                         |
| <i>Endocytosis</i>                             | 20           | 0.00           | ARFGAP1, HRAS, CLTB, CHMP6, AP2S1, VPS37B, PIP5K1C, ADRBK1, VPS37D, FAM125A, RAB11FIP3, AP2A1, RAB11B, VPS24, HSPA7, HGS, VPS28, EPN1, ARAP1, SH3GL1 |
| <i>Notch signaling pathway</i>                 | 8            | 0.01           | CTBP1, NOTCH1, JAG2, DLL1, RFNG, LFNG, NCOR2, DVL1                                                                                                   |
| <i>Ribosome</i>                                | 11           | 0.01           | RPS28, RPL18A, RPL13, RPL8, RPLP1, RPS15, RPLP2, RPL36, RPS9, FAU, RPL28                                                                             |
| <i>Axon guidance</i>                           | 14           | 0.01           | HRAS, PLXNA1, LIMK1, PLXNB2, EFNB1, EPHB3, EPHB6, SEMA6C, RAC3, SEMA3F, PAK4, SEMA3B, ROBO3, RHOD                                                    |
| <i>VEGF signaling pathway</i>                  | 10           | 0.01           | HRAS, SPHK2, MAP2K2, RAC3, PLA2G6, HSPB1, BAD, SHC2, PIK3R2, AKT2                                                                                    |
| <i>Huntington's disease</i>                    | 17           | 0.01           | ATP5D, CLTB, POLR2E, POLR2L, NDUFB7, AP2S1, POLR2J, COX8A, CYC1, COX5B, NDUFS7, GPX1, PLCB3, UQCR11, AP2A1, BBC3, NDUFS8                             |
| <i>Acute myeloid leukemia</i>                  | 8            | 0.02           | CEBPA, JUP, HRAS, MAP2K2, RPS6KB2, BAD, PIK3R2, AKT2                                                                                                 |
| <i>Lysosome</i>                                | 12           | 0.03           | ATP6V0C, TCIRG1, NAGLU, NAGPA, CLTB, ARSA, GAA, CTSD, ABCA2, MAN2B1, IDUA, CTSF                                                                      |
| <i>Oxidative phosphorylation</i>               | 12           | 0.05           | ATP5D, ATP6V0C, TCIRG1, NDUFS7, ATP6V0E2, UQCR11, NDUFB7, NDUFS8, CYC1, COX8A, COX5B, NDUFA11                                                        |
| <i>Arachidonic acid metabolism</i>             | 7            | 0.05           | GGT5, GPX1, PTGES2, PTGDS, GPX4, PLA2G6, LTC4S                                                                                                       |
| <i>ErbB signaling pathway</i>                  | 9            | 0.06           | HRAS, MAP2K2, PAK4, RPS6KB2, BAD, MAP2K7, SHC2, PIK3R2, AKT2                                                                                         |
| <i>MAPK signaling pathway</i>                  | 20           | 0.06           | TRAF2, HRAS, TAOK2, MAP2K2, MKNK2, ECSIT, TGFB1, RPS6KA4, RAC3, GADD45G, MAPK8IP3, HSPA7, RRAS, HSPB1, PLA2G6, MAPK8IP1, MAP2K7, CD14, AKT2, MAP3K11 |
| <i>Insulin signaling pathway</i>               | 12           | 0.07           | SREBF1, HRAS, MAP2K2, MKNK2, FASN, RPS6KB2, IGF2, BAD, SHC2, LIPE, PIK3R2, AKT2                                                                      |
| <i>Phosphatidylinositol signaling system</i>   | 8            | 0.07           | PLCB3, CDIPT, DGKQ, INPPL1, PLCD3, DGKZ, PIP5K1C, PIK3R2                                                                                             |
| <i>Chronic myeloid leukemia</i>                | 8            | 0.07           | HRAS, CTBP1, MAP2K2, BAD, SHC2, TGFB1, PIK3R2, AKT2                                                                                                  |
| <i>Downregulated</i>                           |              |                |                                                                                                                                                      |
| <i>Term</i>                                    | <i>Count</i> | <i>p-value</i> | <i>Genes</i>                                                                                                                                         |
| <i>Spliceosome</i>                             | 4            | 0.01           | HNRNPA3, THOC2, HSPA8, PRPF38A                                                                                                                       |
| <i>Biosynthesis of unsaturated fatty acids</i> | 2            | 0.06           | FADS1, ELOVL6                                                                                                                                        |

**Table S7:** Related to Figure 5. Q-PCR primer sequences.

| Gene            | Common protein name                   | Primers                                                           |
|-----------------|---------------------------------------|-------------------------------------------------------------------|
| <i>ADIPOQ</i>   | Adiponectin                           | F 5'-GCAGGCATCCCAGGACATC-3'<br>R 5'-GCGATACATATAAGCGGCTTCT-3'     |
| <i>ADRB1</i>    | $\beta$ -adrenergic receptor 1        | F 5'-ATCGAGACCCTGTGTGTCATT-3'<br>R 5'-GTAGAAGGAGACTACGGACGA-3'    |
| <i>ADRB2</i>    | $\beta$ -adrenergic receptor 2        | F 5'-TGGTGTGGATTGTGTCAGGC-3'<br>R 5'-GGCTTGGTTCGTGAAGAAGTC-3'     |
| <i>ADRB3</i>    | $\beta$ -adrenergic receptor 3        | F 5'-GACCAACGTGTTTCGTGACTTC-3'<br>R 5'-GCACAGGGTTTCGATGCTG-3'     |
| <i>CCL2</i>     | Monocyte Chemotactic Protein 1        | F 5'-CAGCCAGATGCAATCAATGCC-3'<br>R 5'-TGGAATCCTGAACCCACTTCT-3'    |
| <i>COX5B</i>    | Cytochrome C Oxidase Subunit 5B       | F 5'- TGTGAAGAGGACAATACCAGCG-3'<br>R 5'- CCAGCTTGTAATGGGCTCCAC-3' |
| <i>DIO2</i>     | Deiodinase, Iodothyronine, Type II    | F 5'-TCCAGTGTGGTGCATGTCTC-3'<br>R 5'-CTGGCTCGTGAAAGGAGGTC-3'      |
| <i>ELOVL3</i>   | ELOVL Fatty Acid Elongase 3           | F 5'-TGGGGCATTATGGGGACTGT-3'<br>R 5'-AGGACCAGAATTTGACTGTGGA-3'    |
| <i>FASN</i>     | Fatty Acid Synthase                   | F 5'-CCGAGACACTCGTGGGCTA-3'<br>R 5'-CTTCAGCAGGACATTGATGCC-3'      |
| <i>FGF21</i>    | Fibroblast growth factor 21           | F 5'-GCCTTGAAGCCGGGAGTTATT-3'<br>R 5'-GTGGAGCGATCCATACAGGG-3'     |
| <i>IL4</i>      | Interleukin 4                         | F 5'-CGGCAACTTTGTCCACGGA-3'<br>R 5'-TCTGTTACGGTCAACTCGGTG-3'      |
| <i>LIPE</i>     | Hormone-Sensitive Lipase              | F 5'-AGGAGCCAGCATTGAGACAAA-3'<br>R 5'- CGCAGGTGTTGATTGAGCTTC-3'   |
| <i>PPARGC1A</i> | PPAR $\gamma$ Coactivator 1- $\alpha$ | F 5'-TGAAGACGGATTGCCCTCATT-3'<br>R 5'-GCTGGTGCCAGTAAGAGCTT-3'     |
| <i>PPARGC1B</i> | PPAR $\gamma$ Coactivator 1- $\beta$  | F 5'-GATGCCAGCGACTTTGACTC-3'<br>R 5'-ACCCACGTCATCTTCAGGGA-3'      |
| <i>PRDM16</i>   | PR/SET Domain 16                      | F 5'-GTTCTGCGTGGATGCAAATCA-3'<br>R 5'-GGTGAGGTTCTGGTCATCGC-3'     |
| <i>RPLP0</i>    | Ribosomal Protein, Large, P0          | F 5'-GCAGCATCTACAACCCTGAAG-3'<br>R 5'-CACTGGCAACATTGCGGAC-3'      |
| <i>UCP1</i>     | Uncoupling Protein 1                  | F 5'-AGGTCCAAGGTGAATGCC-3'<br>R 5'-TTACCACAGCGGTGATTGTTC-3'       |
| <i>UCP2</i>     | Uncoupling Protein 2                  | F 5'-GGAGGTGGTCGGAGATACCAA-3'<br>R 5'-ACAATGGCATTACGAGCAACAT-3'   |
| <i>UCP3</i>     | Uncoupling Protein 3                  | F 5'-AAGGTCCGATTCAGGCCAG-3'<br>R 5'-GCGATGGTTCTGTAGGCGTC-3'       |
